**Slime moulds use heuristics based on within-patch experience to decide when to leave**

TANYA LATTY<sup>1</sup> and MADELEINE BEEKMAN<sup>2</sup>

1. Department of Plant and Food Science, Faculty of Agriculture and the Environment, University of Sydney, NSW, 2015, Australia

2. Behaviour and Genetics of Social Insects Lab and Centre for Mathematical Biology, School of Biological Sciences A12, University of Sydney, NSW 2006, Australia.

1- corresponding author

Phone: (61) (2) 8627 1122 Fax: (61) (2) 93514771. Email [tanya.latty@sydney.edu.au](mailto:tanya.latty@sydney.edu.au)

## **Abstract**

Animals foraging in patchy, non- or slowly-renewing environments must make decisions about how long to remain within a patch. Organisms can use heuristics ('rules of thumb') based on available information to decide when to leave the patch. Here we investigate proximate patch departure heuristics in two species of giant, brainless amoeba: the slime moulds *Didymium bahiense* and *Physarum polycephalum*. We explicitly tested the importance of information obtained through experience by eliminating chemosensory cues of patch quality. In *Physarum polycephalum*, patch departure was influenced by the consumption of high, and to a much lesser extent low, quality food items such that engulfing a food item increased patch residency time. *Physarum polycephalum* also tended to forage for longer in darkened, 'safe' patches. In *Didymium bahiense*, engulfment of either a high or low quality food item increased patch residency irrespective of that food item's quality. Exposure to light had no effect on the patch residency time of *D. bahiense*. Given that our organisms lack a brain, our results illustrate how the use of simple heuristics can give the impression that individuals make sophisticated foraging decisions.

Keywords: decision making, foraging, protist, rules of thumb, sampling, unicellular

## **Introduction**

Animals foraging in patchy environments are faced with complex decisions about how to search for food, where to forage, and how long to remain within patches of varying quality. The Marginal Value Theorem (MVT) predicts that the optimal strategy for foragers is to depart patches when the instantaneous rate of return in the patch falls to the average rate of return that can be achieved in all the other patches within the environment (Charnov 1976). However, the MVT does not provide a mechanistic (proximate) strategy in the absence of complete information about the global foraging environment. Even if global information was available, the cognitive load required to process this information is likely beyond the capacity of most if not all organisms. Therefore to make accurate, yet computationally efficient decisions, organisms may employ simple behavioural rules, known as ‘rules of thumb’ or heuristics. Heuristics allow foragers to use selected information from the environment to make decisions that, while not optimal, are often ‘good enough’ (Hutchinson and Gigerenzer, 2005). Foragers might, for example, leave a patch after consuming a fixed number of food items (Gibb, 1962), after a fixed length of time (Krebs, 1973), or after a certain period of time has elapsed without food encounters (Krebs et al., 1974). Heuristics have the benefit of being computationally efficient, yet often result in near-optimal solutions (Hutchinson and Gigerenzer, 2005).

Perhaps the most well studied patch-leaving heuristic was proposed by Waage (1979) based on the patch-leaving decisions made by female parasitoid wasps. Waage (1979) proposed that parasitoids use each sequential host encounter as a piece of information to update their expectation about patch quality. According to this model, females enter a patch with a baseline probability of remaining in the patch. Each encounter with a suitable host either increases or decreases the parasitoid’s probability of leaving the patch. If each encounter with a host increases patch residency time, then the parasitoid is said to be using an ‘incremental departure’ mechanism. Conversely, if host encounters decrease the tendency to remain in the patch, the parasitoid is said to be using a ‘decremental’ or ‘count down’ departure mechanism (Driessen and Bernstein 1999). In addition to encounters with food, other factors such as the presence of competitors or predators could

theoretically influence patch departure by altering the baseline leaving probability. For example, individuals foraging in a dangerous environment might increase their baseline departure probability thus leaving the patch sooner.

To date, studies of patch-leaving heuristics have focused exclusively on neurologically sophisticated organisms; after all, even the tiniest parasitoid wasps have brains containing hundreds (and more usually tens of thousands) of neurons (Polilov, 2012). Yet many of earth's taxa, including large and ecologically significant groups such as bacteria, plants and fungi, lack brains. Here we ask two main questions: are brainless organisms capable of using information obtained while foraging to inform their patch-leaving decisions? If so, which heuristics do they use? We addressed these questions using two species of slime moulds: *Physarum polycephalum* and *Didymium bahiense*. Slime moulds are large, unicellular organisms that forage as a mass of flowing pseudopods, engulfing and digesting suitable food items as they move through their environment. Previous work on slime mould foraging behaviour found that *P. polycephalum* is capable of altering its search strategy according to food quality (Latty and Beekman, 2009), balancing a trade-off between risk and food quality (Latty and Beekman, 2010), solving shortest path problems (Nakagaki et al., 2000; Nakagaki et al., 2004; Tero et al., 2010; Reid and Beekman, 2013), and balancing its uptake of several macronutrients (Dussutour et al., 2010). *Didymium bahiense* and *P. polycephalum* were selected as study species because they were easy to obtain and were both amenable to culture in the laboratory.

Here, we investigated patch-leaving heuristics in slime moulds in experimental arenas (Fig.1). The arena contained artificial food patches consisting of 9 individual food items of either high (6% oat) or low (1% oats) food concentration. Since we were interested in determining whether or not slime moulds could integrate information obtained during sampling, it was important that we prevent chemosensory cues from diffusing through the agar and providing slime moulds with global information about patch quality. We therefore placed each food item on top of a small disk made from impermeable plastic. We created patches of different quality by adjusting the number of high quality food disks available. We used 4 levels of patch quality with patches containing either 3,4,5 or 6 high concentration (6% oat meal) food items per patch. The remaining food disks were of low concentration (1% oat meal) foods. In addition to investigating the effect of patch quality, we were

also interested in whether or not slime moulds used information about risk. We used light as an abiotic danger because exposure to light causes nuclear degeneration (Devi et al. 1968) and reduces growth rate (Latty and Beekman 2010). Arenas were randomly assigned to either a 'safe' or a 'dangerous' treatment environment, resulting in a total of 8 treatments (4 levels of patch quality, 2 levels of danger).

We analysed our data using cox proportional hazards models. Proportional hazard models consist of a hazard function that, in our analysis, describes the probability per unit time that a plasmodium will leave the patch (given that it is still on it), and a risk ratio that describes how the tendency to leave a patch is influenced by each explanatory variable. Risk ratios greater than 1 indicate an increase in the probability of leaving the patch while risk ratios less than 1 indicate that the factor decreases the probability of leaving the patch.

## **Results**

### *Physarum polycephalum*

Each encounter with a high concentration food disk increased the probability that *P. polycephalum* amoebae remain in the patch (Table 1, Figure 2a). The number of low quality food items engulfed had a marginally significant effect on patch departure time, such that each engulfment tended to increase the length of time plasmodia remained in the patch (Table 1, Figure 2a). Patch quality had a significant influence on patch departure time, but the risk ratio was very close to 1, suggesting a relatively small increase in the risk of leaving (Table 1). *Physarum polycephalum* plasmodia stayed in darkened patches longer than they did in illuminated patches (Table 1).

A small proportion (9%) of *P. polycephalum* plasmodia fragmented into multiple amoebae; fragmentation was not influenced by patch illumination (chi-square test:  $\chi^2 = 1.35$ ,  $p = 0.24$ ,  $n = 117$ ) or patch quality (logistic regression:  $\chi^2 = 0.5$ ,  $p = 0.24$ ,  $n = 117$ ).

### *Didymium bahiense*

Each engulfment of a food item increased the length of time *D. bahiense* spent in the patch, irrespective of the food item's quality (Table 1, Figure 2b). Neither illumination nor overall patch value influenced patch departure time (Table 1).

Overall, 19% of *D. bahiense* plasmodia fragmented, and the tendency to fragment was significantly higher in the illuminated environments (chi square;  $\chi^2 = 18.0$ ,  $p < 0.0001$ ,  $n = 93$ ). In the dark, only 5% of plasmodia fragmented, compared to 40.5% in the illuminated patch. Patch quality did not have a significant influence on fragmentation (Logistic regression:  $\chi^2 = 1.04$ ,  $P = 0.30$ ,  $N = 94$ ).

## **Discussion**

Our study aimed to answer two main questions: are brainless organisms capable of using information obtained while foraging to inform their patch-leaving decisions and, if so, which heuristics do they use? We found evidence that both *D. bahiense* and *P. polycephalum* used information about patch quality obtained during sampling. Since plasmodia were prevented from accessing chemosensory information about global patch quality, our study demonstrates that slime moulds can adapt their patch-leaving behaviour using information on patch quality obtained by sampling individual discrete food items.

Our results are consistent with the use of an incremental patch departure rule in both *P. polycephalum* and *D. bahiense*. In addition to being extensively reported in parasitoid wasps, incremental and decremental patch departure heuristics have also been observed in bumble bees (Lefebvre et al., 2007; Biernaskie et al., 2009) and humans (Hutchinson et al., 2008; Wilke et al., 2009; Louâpre et al., 2010). It has even been suggested that humans use incremental departure rules when solving word problems (Wilke et al., 2009). The use of an apparent departure heuristic in slime moulds suggests that patch departure heuristics can be implemented by organisms with limited information processing capabilities. Heuristics may therefore underlie many departure decisions irrespective of the organism's precise information processing abilities.

Our experiment does not allow us to rule out the possibility that the slime moulds based their decision on 'time since last capture', rather than on the strict incremental departure rule. Using simulated data Hutchinson and colleagues (Hutchinson et al., 2008) showed that the behaviour generated by animals using incremental heuristics was indistinguishable from an animal using a heuristic based on time since last capture when results are analysed using the standard cox regression

model. The two distinct rules can be distinguished from one another if both ‘time since last food capture’ and ‘number of captures’ is included in the cox regression model. Unfortunately, determining time since last capture in a slime mould is logistically difficult because of the organism’s amoeboid morphology. Time since last food capture ideally encapsulates information about how long an organism has gone without feeding. However, slime moulds remain in contact with multiple food items whilst simultaneously searching the environment, thus making it difficult to measure the time since last food capture in any meaningful way. Thus, we are unable to distinguish whether the slime mould is truly using an incremental rule, or whether it is using a rule based on the time since its last food capture. In either case, the strength of our result is in the finding that the slime moulds are using information about encounters with food items to modify their patch residence behaviour.

How do encounters with food items modify patch residence time, given that slime moulds lack a nervous system? In parasitoid wasps, patch departure mechanisms are driven by changes in locomotory behaviour. Contact with food-associated cues increases turning rates and decreases walking speed (Gardner and Van Lenteren, 1986; Wajnberg, 2006). A similar mechanism is likely at play in slime moulds. Previous work on *P. polycephalum* found that slime moulds which fed on high concentration foods tended to engage in area restricted search, characterised by slower movements, higher fractal dimension (more ‘intense’ search), and a more localised search pattern (Latty and Beekman, 2009). Each engulfment of a high quality food item would therefore lead to an increase in patch residency time, as we have observed here in *P. polycephalum*. Also consistent with our results, a study on the search strategy of *D. bahiense* failed to find any effect of food concentration on the amount of area restricted search the plasmodia engaged in after consuming a food item (Yip et al., 2014). The same study found that *D. bahiense* was only sensitive to the presence or absence of food such that when food was present, plasmodia engaged in area restricted search irrespective of the food’s concentration. Such behaviour would explain our finding that the consumption of both high and low concentration food items increased patch residency time in *D. bahiense*. One of the benefits of incremental and decremental patch departure heuristics may be their easy implementation through simple changes in locomotory behaviour, and the fact that they do not necessarily require the use of more intensive cognitive abilities such as memory or learning. We suggest that future studies might

look for evidence of incremental or decremental patch departure heuristics in other non-neuronal organisms such as plants, fungi and bacteria.

Analytical models predict that the optimal patch departure heuristic depends crucially on the distribution of prey and on variance in patch quality (Iwasa et al., 1981). Although little is known about the foraging ecology of natural populations of *D. bahiense* and *P. polycephalum*, most slime moulds are bacterial and fungal predators (Stephenson et al., 1994) and it has been suggested that *P. polycephalum* is a mushroom specialist (Martin and Alexopoulos, 1969). Although it is plausible that these resources occur in aggregated patches (for example, bacterial colonies), the variance in quality within these food patches is unknown. Indirect evidence that slime moulds forage on aggregated resources comes from experimental microlandscape studies on *P. polycephalum* which found that plasmodia gain more weight when foraging in patches in which within-patch variation in food quality was high (Latty and Beekman, 2009). We tentatively suggest that the incremental patch departure heuristic used by *D. bahiense* and *P. polycephalum* allows them to forage efficiently on spatially aggregated resources.

Our two species of slime mould appear to use different patch departure heuristics. In *P. polycephalum*, each engulfment of a high concentration food item led to a 2.45 times decrease in the probability that the slime mould would leave the patch (calculated by taking the reciprocal of the risk ratio, see Table 1). In contrast, each engulfed low quality item had only a marginally significant effect on patch departure time (see Fig 2 and Table 1). *Physarum polycephalum* therefor appears to distinguish between high and low concentration items when making patch-leaving decisions, such that high quality food items have a stronger effect than do low quality food items, although both are included in the decision heuristic. In *D. bahiense*, engulfing a food item decreases the probability that a plasmodium will leave the patch irrespective of the food's concentration (Fig 2b). Our pilot experiments showed that *D. bahiense* can readily distinguish between a 1% and a 6% food disk, and that they have a strong preference for the 6% food disk; thus, our results cannot be explained by an inability to tell the two kinds of food disk apart. Taken together our results show that slime moulds are capable of using patch departure heuristics that use information obtained during sampling, but that the details of these heuristics are species-dependent.



*Physarum polycephalum* and *D. bahiense* also differed in their response to light exposure.

*Physarum polycephalum* adjusts its foraging strategy when exposed to light, while *D. bahiense* seems indifferent to light exposure. The negative effects of light exposure on *P. polycephalum* are well described (Devi et al., 1968; Dove and Rusch, 1980) and it is generally assumed that light exposure will have a negative effect on all slime mould species. However, there are no specific data on the effect of light exposure for *D. bahiense*. Thus, it is possible that *D. bahiense* did not alter its foraging behaviour when illuminated because it is less susceptible to the negative effects of light exposure than is *P. polycephalum*. However, light exposure increased the probability that *D. bahiense* would fragment into multiple pieces, each of which continued foraging independently. Fragmentation can result from irradiation by high levels of UVA (Kakiuchi et al., 2001) or exposure to low temperatures (Kakiuchi and Ueda, 1999), presumably indicating that fragmentation is a response to stressful conditions. Thus, it appears that light exposure impacts behaviour in slime moulds differently: *P. polycephalum* reacts by altering its foraging behaviour, while *D. bahiense* responds by fragmenting.

Our work builds on the growing body of evidence suggesting that slime moulds are capable of making complex decisions that integrate information from a variety of sources (Latty and Beekman, 2009; Dussutour et al., 2010; Latty and Beekman, 2010; Latty and Beekman, 2011a, b; Reid et al., 2012, 2013). Here we show that, despite being little more than giant amoebae, slime moulds use departure heuristics similar to those used by many animals, including humans. This is remarkable given that the mechanism of decision making in slime moulds must be substantially different from the neuron-based decision making systems of animals. Our results therefore suggest that a brain is not a prerequisite for many forms of decision making.

## **Materials and Methods**

### **Collection and Culture**

*Physarum polycephalum* cultures were obtained from Southern Biological Supplies (Nunawading, Australia). Cultures were maintained on a media composed of oat flakes (Coles brand, Australia)

mixed with 1% water agar and poured into 30 x 30 cm rectangular plastic tubs. We sub-cultured plasmodia onto fresh media every 3 days. Cultures were maintained in the dark at 23° C.

*Didymium bahiense* cultures were obtained from leaf litter using the ‘moist chamber’ extraction technique (Martin and Alexopoulos, 1969). Briefly, leaf litter (sticks, leaves, twigs) collected from around the University of Sydney (NSW, Australia) was placed in plastic petri dishes (140 mm diameter) lined with filter paper. We filled each dish with distilled water and allowed it to soak for 24 hours. We then drained each dish of excess water and left them under standard culture conditions (23° C in the dark) for 3 weeks. We visually examined each dish for plasmodia on a daily basis; if plasmodia were detected, we placed oat flakes in the anticipated path of growth. Once the slime mould covered the oat flake, we removed the flake (with the slime mould) and transferred it onto a smaller petri plate (90 mm diameter, 1.5% agar) for ongoing culture on agar. We sprinkled powdered oats on the culture every three days. Although several slime mould species were eventually isolated using this method, we chose to focus on *D. bahiense*, because it yielded a vigorous, rapidly growing plasmodia that readily consumed oatmeal food disks.

### **Experimental techniques**

We made food items by mixing different amounts of finely ground oats with 1% water agar. High concentration food items contained 6% oatmeal, while low concentration food items contained 1% oatmeal. Previous work on *P. polycephalum* shows that the slime mould prefers higher concentration food disks over lower concentration food disks (Latty and Beekman, 2010; Latty and Beekman, 2011a). As no such data existed for *D. bahiense*, we ran a pilot trial in which small plasmodia were offered a binary choice between 1% oatmeal food disks and 6% oatmeal food disks. Out of the 20 plasmodia, 20 (100%) had selected the 6% food disk by engulfing it within 24 hours. We were therefore confident that *D. bahiense* could distinguish between 1% and 6% food disks.

Foraging arenas for the present study consisted of 30 mm diameter petri dishes filled with 1% agar. Each petri dish contained 1 food patch consisting of nine food items arranged into a 3 x 3 grid (Fig 1). Food items were placed 5 mm apart. We were specifically interested in the role of information obtained through experience, as opposed to global information obtained through a combination of sampling and chemosensory cues. Since we did not want the slime moulds to have access to

chemosensory information before contacting and sampling food items, we used a syringe to place a droplet of molten agar-oatmeal mixture (the food item) on top of a 1 mm diameter plastic circle, taking care to ensure that none of the food mixture was in direct contact with the agar. The impermeable plastic prevented chemosensory cues from diffusing into the agar. We used a random number generator (Random NumGenerator version 2.0 for iPhone, Bice applications) to determine which of the 9 plastic circles would contain high quality foods and which would contain low quality foods.

Experiments were conducted at 24° C. The experimental setup was identical for both species of slime mould. We assigned 15 (*D. bahiense*) and 15 (*P. polycephalum*) plasmodia to each treatment group. During the experiment, 36 *D. bahiense* replicates were excluded due to failure of the cameras (20) or contamination by fungi (17). Similarly, 38 *P. polycephalum* replicates were excluded due to camera failure (25) and fungal contamination (13).

We started the experiment by cutting plasmodial fragments from the extending front of an actively growing plasmodia using a standardised 2 mm diameter punch. Since plasmodia are multinucleate, severed fragments become fully functioning individuals within minutes of separation from the main cell (Kobayashi et al., 2006). We randomly placed fragments in food patches in one of four possible ‘start’ locations (Fig 1). We took pictures every hour using a Canon digital SLR E0X camera equipped with an intervalometer. Each picture contained a ruler used for scale. Pictures were examined using the imaging software ‘ImageJ’ (NIH).

Since slime moulds are amoeboid, they can search beyond the patch while still remaining in contact with items in the patch. This ability to be in multiple places at once makes it difficult to quantify patch departure time. In most of our experiments, slime moulds searched around the petri dish whilst remaining attached via a tubule to at least one food item within the patch. In our experiments, plasmodia were considered to have left the patch when a pseudopod had extended at least 2 cm away from the closest food item into the surrounding agar matrix. We chose this definition because our previous experiments had indicated that long directional movements indicate that a slime mould has begun to explore the environment for new food items (rather than exploiting current food items) (Latty and Beekman, 2009). Thus, the extension of a pseudopod more than 2 cm from the patch

indicated that the slime mould had commenced exploration and was no longer committed solely to exploitation of resources within its current patch. We analysed picture sequences for each plasmodium to determine patch residency time, and the number of high and low quality food items that were engulfed prior to departure.

During experiments, we noticed that plasmodia occasionally broke into fragments; each fragment would then continue to forage independently. In these cases we continued to track the largest fragment.

### **Statistical analysis**

We tested the hypothesis that slime mould amoebae use information about patch quality obtained through sequential sampling, combined with an assessment of patch dangerousness, to inform their patch-leaving decisions. We used a cox-proportional hazards model (also known as survival analysis) to investigate patch-leaving heuristics in our two species of slime mould. A thorough description on the application of cox-proportional hazards models to patch-leaving decisions can be found in Wajnberg (2006). Briefly, the cox proportional hazards model is a flexible statistical tool that can be used to test the effect of explanatory variables on the baseline patch-leaving tendency of an organism (Wajnberg, 2006). It has been used to identify patch-leaving rules in a variety of animals (for example, Driessen and Bernstein, 1999; Wajnberg et al., 2000; Wajnberg et al., 2003; Boivin et al., 2004; Wajnberg, 2006; Lefebvre et al., 2007; Louâpre et al., 2011). Proportional hazard models yield a hazard function that describes the probability per unit time that a plasmodium will leave the patch (given that it is still on it), and a risk ratio that describes how the tendency to leave a patch is changed by each explanatory variable. In our experiments, explanatory variables with risk ratios less than 1 indicate that the variable causes a decreased tendency to leave a patch, whilst ratios greater than 1 indicate that the variable increases the tendency to leave a patch. For example, if 'light' has a risk ratio of 3, then individuals in the light have 3 times the risk of leaving the patch than individuals in the dark. We included the number of high quality food items engulfed, the number of low quality food items engulfed, patch quality, and patch riskiness (light/dark) as explanatory variables in our model. All analyses were conducted using JMP 9 (SAS).

## Acknowledgments

We thank student volunteers Helen Le, Andrew Dang, Sara Perry and Samantha Zaitar. James Makinson and Michael Holmes also helped with data extraction.

## Funding

We would like to thank the Australian Research Council (DP110102998 to TL and DP0878924 and FT120100120 to MB), the Natural Sciences and Engineering Research Council of Canada (TL) and the Branco Weiss Society in Science Fellowship (TL).

Table 1: Factors influencing patch residence time. The table summarises the results of cox proportional hazards model for *P. polycephalum* and *D. bahiense*. Risk ratios describe how much a risk factor changes the probability of leaving the patch. Risk ratios greater than 1 indicate an increase in the probability of leaving the patch. Risk ratios less than 1 indicate that the factor decreases the probability of leaving the patch. Significant p values are highlighted in bold. \* The value presented shows the risk ratio relative to the 'illuminated' condition, so that values above 1 indicate that plasmodia were more likely to leave the patch if it was illuminated. For *P. polycephalum*, the risk of leaving an illuminated patch is 3.33 times greater than the risk of leaving a darkened patch.

| Factor                           | P                 | $\chi^2$ | Estimate    | Risk ratio (per unit change in regressor) |
|----------------------------------|-------------------|----------|-------------|-------------------------------------------|
| <i>P. polycephalum</i> , n = 82  |                   |          |             |                                           |
| Patch quality                    | <b>0.017</b>      | 5.66     | 0.07±0.15   | 1.07                                      |
| # of high quality foods engulfed | <b>&lt;0.0001</b> | 42.93    | -0.88±0.15  | 0.41                                      |
| # of low quality foods engulfed  | 0.05              | 3.84     | 0.2±0.10    | 0.81                                      |
| *Light/dark                      | <b>&lt;0.0001</b> | 19.22    | -0.60±0.14  | 3.33                                      |
| <i>D. bahiense</i> , n = 83      |                   |          |             |                                           |
| Patch quality                    | 0.51              | 0.41     | -0.018±0.03 | 0.98                                      |
| # of high quality foods engulfed | <b>&lt;0.0001</b> | 22.1     | -0.64±0.14  | 0.52                                      |
| # of low quality foods engulfed  | <b>0.01</b>       | 6.61     | -0.32±0.13  | 0.72                                      |
| Light                            | 0.14              | 2.14     | -0.22±0.16  | 1.58                                      |

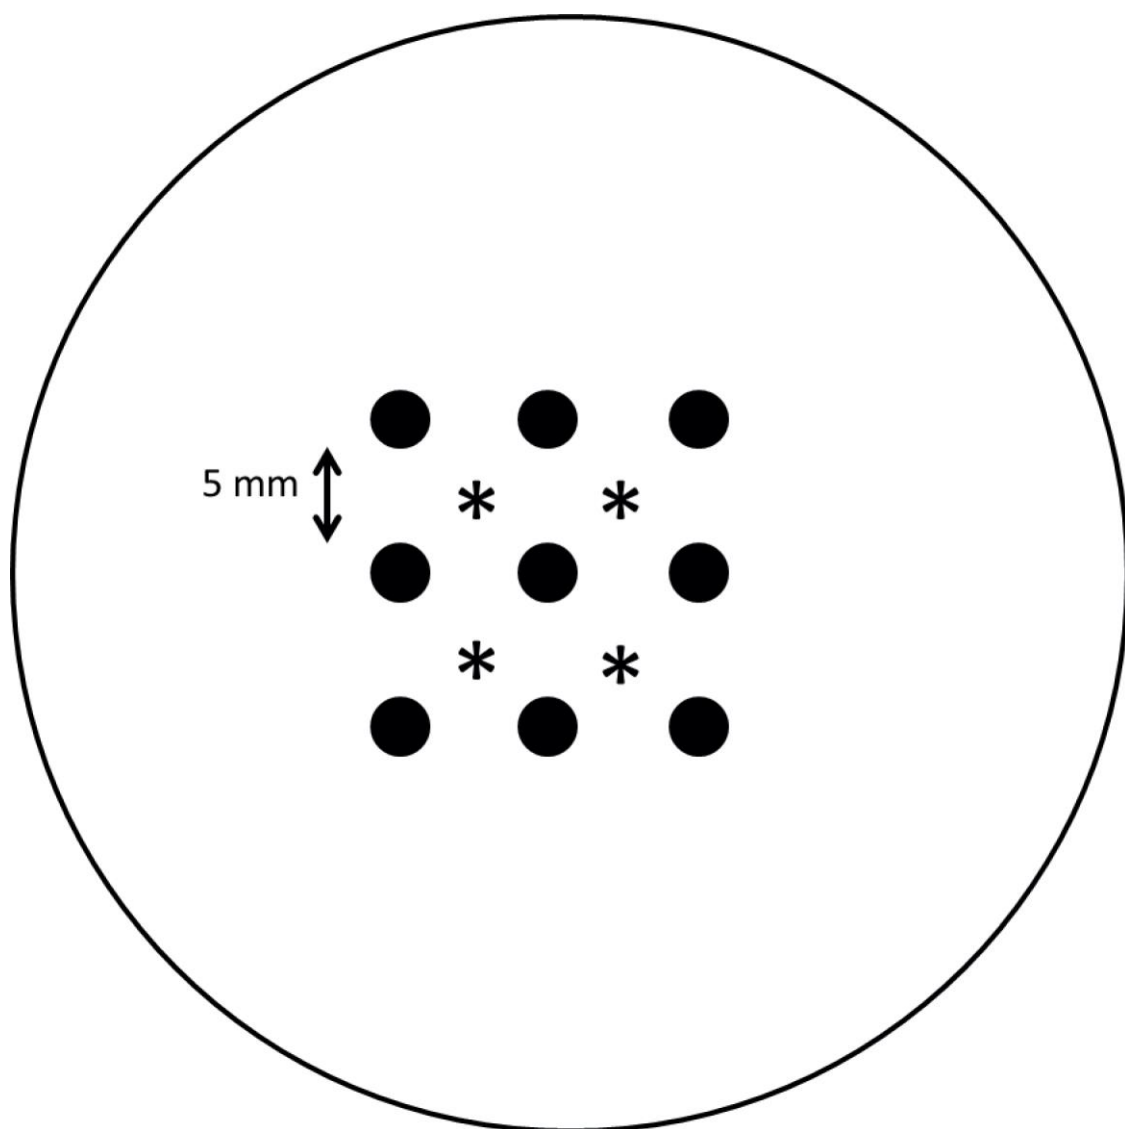

Figure 1: Experimental arenas. The dark circles represent food disks which could be of either high (6%) or low (1%) oatmeal concentration. The asterisks show each of the four possible 'start' locations. Start locations were selected randomly.

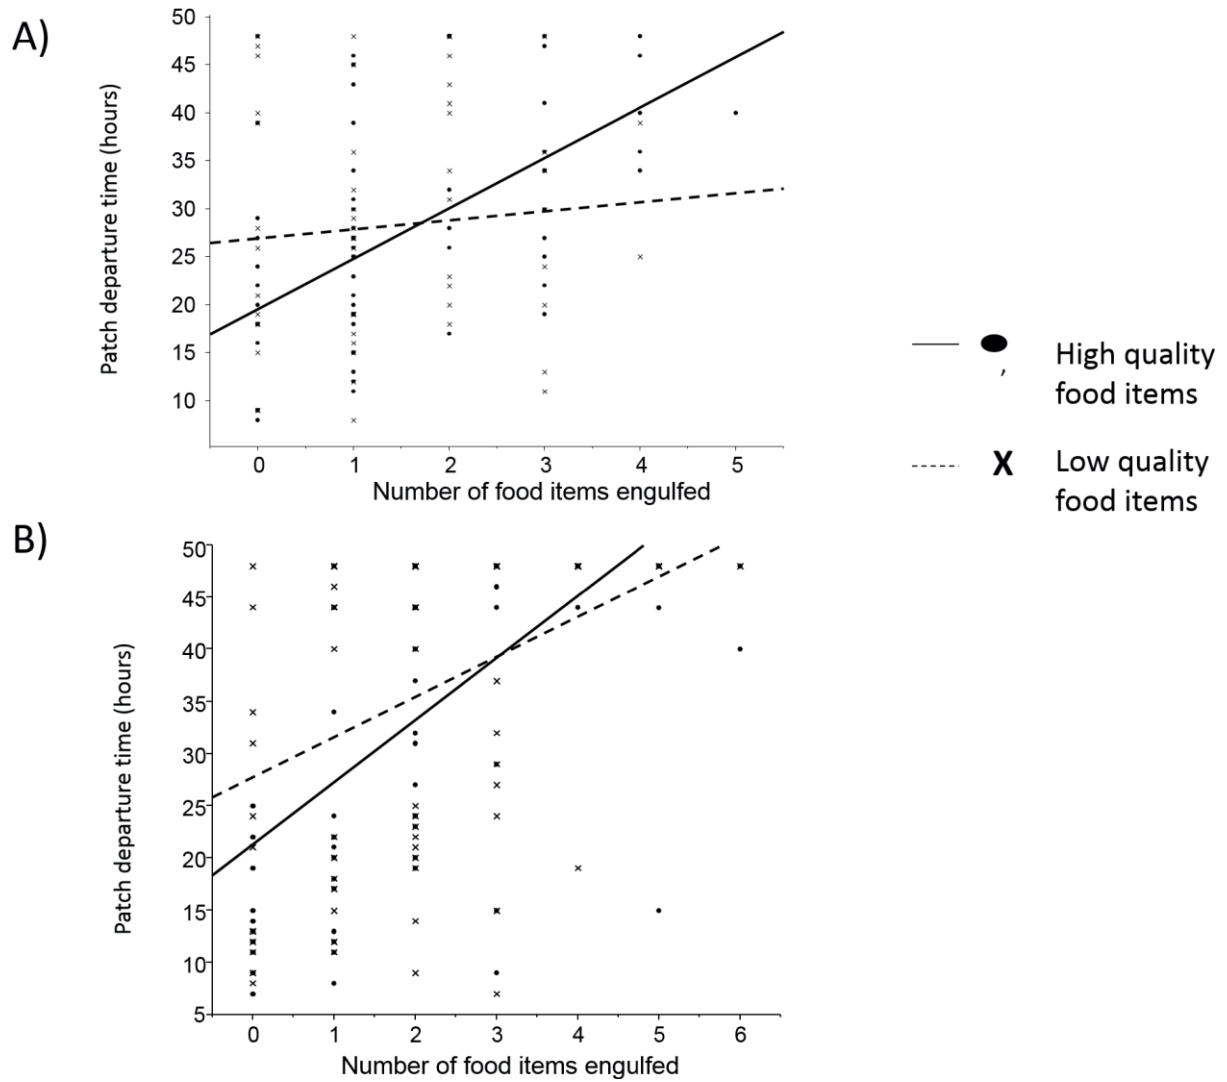

Figure 2. The effect of engulfing high and low quality food items on the time it took for plasmodia to leave patches. A) *Physarum polycephalum*. B) *Didymium bahiense*



## References

- Biernaskie, J., Walker, S. and Gegear, R.** (2009). Bumblebees learn to forage like Bayesians. *American Naturalist* **174**, 413-423.
- Boivin, G., Fauvergue, X. and Wajnberg, E.** (2004). Optimal patch residence time in egg parasitoids: innate versus learned estimate of patch quality. *Oecologia* **138**, 640-647.
- Devi, V. R., Guttus, E. and Guttus, S.** (1968). Effects of ultraviolet light on mitosis in *Physarum polycephalum*. *Exp. Cell Res.* **50**, 598-598.
- Dove, W. F. and Rusch, H. P.** (1980). Growth and differentiation in *Physarum polycephalum*. Princeton: Princeton University Press.
- Driessen, G. and Bernstein, C.** (1999). Patch Departure Mechanisms and Optimal Host Exploitation in an Insect Parasitoid. *Journal of Animal Ecology* **68**, 445-459.
- Dussutour, A., Latty, T., Beekman, M. and SJ., S.** (2010). Amoeboid organism solves complex nutritional challenges. *Proceedings of the National Academy of Sciences* **107**, 4607-4611.
- Gardner, S. M. and Van Lenteren, J.** (1986). Characterisation of the arrestment responses of *Trichogramma evanescens*. *Oecologia* **68**, 265-270.
- Gibb, J. A.** (1962). L. Tinbergen's hypothesis of the role of specific search images. *Ibis* **104**, 106-111.
- Hutchinson, J., Wilke, A. and Todd, P. M.** (2008). Patch leaving in humans: can a generalist adapt its rules to dispersal of items across patches? *Animal Behaviour* **75**, 1331-1349.
- Hutchinson, J. M. C. and Gigerenzer, G.** (2005). Simple heuristics and rules of thumb: Where psychologists and behavioural biologists might meet. *Behavioural Processes* **69**, 97-124.
- Iwasa, Y., Higashi, M. and Yamamura, N.** (1981). Prey distribution as a factor determining the choice of optimal foraging strategy. *American Naturalist*, 710-723.
- Kakiuchi, Y. and Ueda, T.** (1999). Fragmentation of the plasmodium into equally sized pieces by low temperatures in the true slime mold *Physarum polycephalum*: A new morphogenesis. *Protoplasma* **206**, 131-136.
- Kakiuchi, Y., Takahashi, T., Murakami, A. and Ueda, T.** (2001). Light Irradiation Induces Fragmentation of the Plasmodium, a Novel Photomorphogenesis in the True Slime Mold *Physarum polycephalum*: Action Spectra and Evidence for Involvement of the Phytochrome A. *Photochem. Photobiol.* **73**, 324-329.
- Kobayashi, R., Tero, A. and Nakagaki, T.** (2006). Mathematical model for rhythmic protoplasmic movement in the true slime mold. *J. Math. Biol.* **53**, 273-286.
- Krebs, J.** (1973). Behavioral aspects of predation. *Perspectives in ethology* **1**, 73-111.
- Krebs, J. R., Ryan, J. C. and Charnov, E. L.** (1974). Hunting by expectation or optimal foraging? A study of patch use by chickadees. *Animal Behaviour* **22**, 953-IN953.
- Latty, T. and Beekman, M.** (2009). Food quality affects search strategy in the acellular slime mould, *Physarum polycephalum*. *Behavioural Ecology*, 1160 - 1167.
- Latty, T. and Beekman, M.** (2010). Food quality and the risk of light exposure effect patch choice decisions in the acellular slime mould *Physarum polycephalum*. *Ecology*, 22-27.
- Latty, T. and Beekman, M.** (2011a). Irrational decision-making in an amoeboid organism: transitivity and context-dependent preferences. *Proceedings of the Royal Society B: Biological Sciences* **278**, 307.
- Latty, T. and Beekman, M.** (2011b). Speed-accuracy trade-offs during foraging decisions in the acellular slime mould *Physarum polycephalum*. *Proceedings of the Royal Society B: Biological Sciences* **278**, 539.
- Lefebvre, D., Pierre, J., Outreman, Y. and Pierre, J.-S.** (2007). Patch departure rules in Bumblebees: evidence of a decremental motivational mechanism. *Behavioral Ecology and Sociobiology* **61**, 1707-1715.
- Louâpre, P., van Alphen, J. J. M. and Pierre, J.-S.** (2010). Humans and Insects Decide in Similar Ways. *PLoS ONE* **5**, e14251.
- Louâpre, P., van Baaren, J., Pierre, J. S. and van Alphen, J. J. M.** (2011). Information gleaned and former patch quality determine foraging behavior of parasitic wasps. *Behavioral Ecology* **22**, 1064-1069.
- Martin, G. W. and Alexopoulos, C.** (1969). The myxomycetes. Iowa: University of Iowa.

- Nakagaki, T., Yamada, H. and Tóth, Á.** (2000). Maze-solving by an amoeboid organism. *Nature* **407**, 470.
- Nakagaki, T., Kobayashi, R. and Nishiura, Y.** (2004). Obtaining multiple separate food sources: behavioural intelligence in the *Physarum* plasmodium. *Proceedings of the Royal Society B: Biological Sciences* **271**, 2305-2310.
- Polilov, A. A.** (2012). The smallest insects evolve anucleate neurons. *Arthropod Structure & Development* **41**, 29-34.
- Reid, C. R. and Beekman, M.** (2013). Solving the Towers of Hanoi—how an amoeboid organism efficiently constructs transport networks. *The Journal of experimental biology*, 1546-1551.
- Reid, C. R., Latty, T., Dussutour, A. and Beekman, M.** (2012). Slime mold uses an externalized spatial “memory” to navigate in complex environments. *Proceedings of the National Academy of Sciences* **109**, 17490-17494.
- Reid, C. R., Beekman, M., Latty, T. and Dussutour, A.** (2013). Amoeboid organism uses extracellular secretions to make smart foraging decisions. *Behavioral Ecology* **24**, 812-818.
- Stephenson, S. L., Stempen, H. and Hall, I.** (1994). Myxomycetes: a handbook of slime molds: Timber press Portland, Oregon
- Tero, A., Takagi, S., Saigusa, T., Ito, K., Bebber, D. P., Fricker, M. D., Yumiki, K., Kobayashi, R. and Nakagaki, T.** (2010). Rules for Biologically Inspired Adaptive Network Design. *Science* **327**, 439-442.
- Wajnberg, E., Fauvergue, X. and Pons, O.** (2000). Patch leaving decision rules and the Marginal Value Theorem: an experimental analysis and a simulation model. *Behavioural Ecology* **11**, 577-586.
- Wajnberg, E., Gonsard, P.-A., Tabone, E., Curty, C., Lezcano, N. and Colazza, S.** (2003). A Comparative Analysis of Patch-Leaving Decision Rules in a Parasitoid Family. *Journal of Animal Ecology* **72**, 618-626.
- Wajnberg, É.** (2006). Time allocation strategies in insect parasitoids: from ultimate predictions to proximate behavioral mechanisms. *Behavioral Ecology and Sociobiology* **60**, 589-611.
- Wilke, A., Hutchinson, J. M. C., Todd, P. M. and Czienskowski, U.** (2009). Fishing for the Right Words: Decision Rules for Human Foraging Behavior in Internal Search Tasks. *Cognitive Science* **33**, 497-529.
- Yip, V., Beekman, M. and Latty, T.** (2014). Foraging strategies of the acellular slime moulds *Didymium iridis* and *Didymium bahiense*. *Fungal Ecology* **11**, 29-36.
